# Supplementary material for: Anti-Inflammatory Effects of Hyperbaric Oxygenation during DSS-Induced Colitis in BALB/c Mice Include Changes in Gene Expression ofHIF-1α, Proinflammatory Cytokines, and Antioxidative Enzymes
Source: Hindawi journal article supplement (doi:10.1155/2016/7141430), 2016-01-01
Supplement: f1 [file 7141430.f1.pdf]

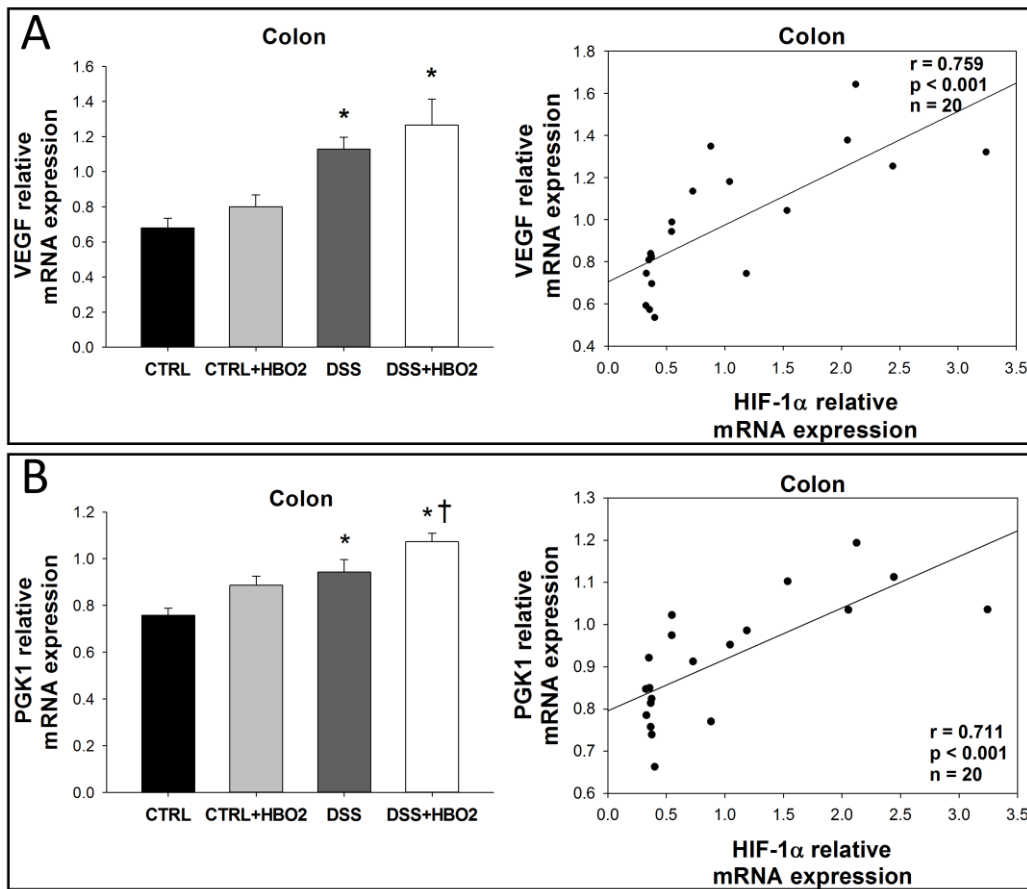

**Supplementary figure 1.**
